# Supplementary material for: Complex Evolutionary History of the Mammalian Histone H1.1–H1.5 Gene Family
Source: PubMed Central journal article supplement — Mol Biol Evol. 2017 Jan 21;34(3):545–58. doi: 10.1093/molbev/msw241 (PMC5400378; doi:10.1093/molbev/msw241), 2017-01-21
Supplement: msw241_supp.pdf [file msw241_supp.pdf]

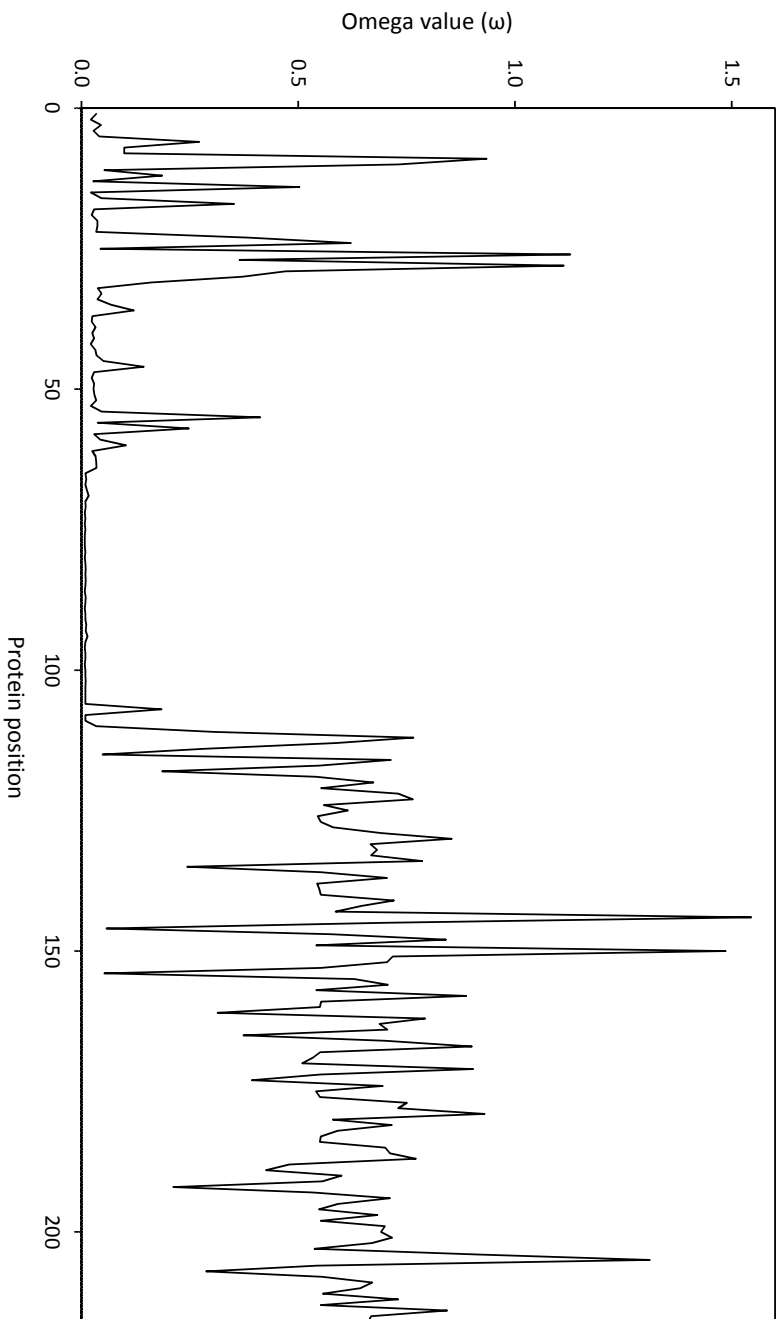

**Figure S3. Representation of the  $\omega$  values for each site along H1.3.** The  $\omega$  values of the individual residues were estimated with the accepted model of the M0-M3 pair for each of the three partitions.

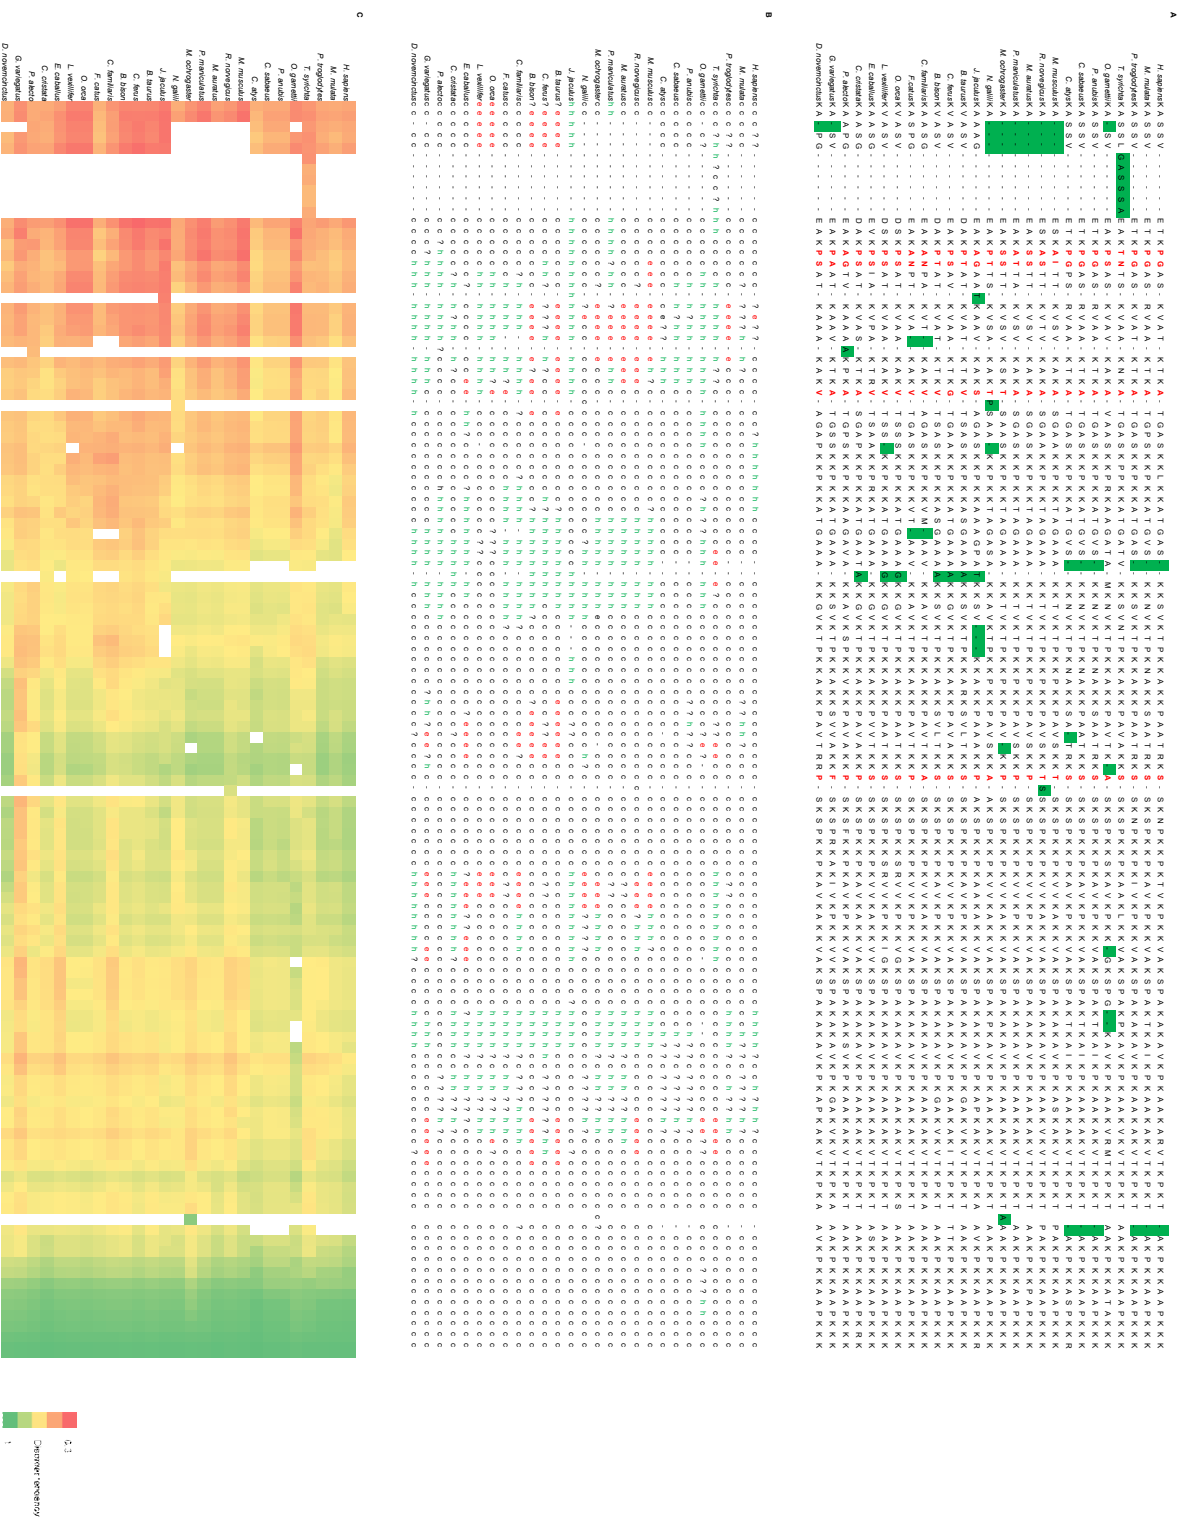

Table S1. NCBI accession numbers of the sequences of the H1 subtypes

| Order          | Specie                        | Subtype | Accession number |
|----------------|-------------------------------|---------|------------------|
|                |                               | 1       | X57130.1         |
|                |                               | 2       | X57129.1         |
|                | <i>Homo sapiens</i>           | 3       | M60747.1         |
|                |                               | 4       | M60748.1         |
|                |                               | 5       | M60747.1         |
|                |                               | 1       | NM_001193709.1   |
|                |                               | 2       | XM_001084417.2   |
|                | <i>Macaca mulatta</i>         | 3       | NM_001193819.1   |
|                |                               | 4       | XM_001086509.2   |
|                |                               | 5       | NM_001194063.1   |
|                |                               | 1       | XM_527252.3      |
|                |                               | 2       | XM_001172525.4   |
|                | <i>Pan troglodytes</i>        | 3       | XM_001172808.2   |
|                |                               | 4       | XM_527259.5      |
|                |                               | 5       | XM_009450699.1   |
|                |                               | 1       | XM_008073507.1   |
|                |                               | 2       | XM_008073501.1   |
|                | <i>Tarsius syrichta</i>       | 3       | XM_008057602.1   |
|                |                               | 4       | XM_008057598.1   |
|                |                               | 5       | XM_008072231.1   |
| Primates       |                               | 1       | XM_003788783.1   |
|                |                               | 2       | XM_003788780.1   |
|                | <i>Otolemur garnettii</i>     | 3       | XM_003788782.2   |
|                |                               | 4       | XM_003788781.2   |
|                |                               | 5       | XM_003801852.1   |
|                |                               | 1       | XM_003897152.2   |
|                |                               | 2       | XM_003897161.2   |
|                | <i>Papio anubis</i>           | 3       | XM_003897183.2   |
|                |                               | 4       | XM_003897174.2   |
|                |                               | 5       | XM_003897220.2   |
|                |                               | 1       | XM_007973498.1   |
|                |                               | 2       | XM_007973490.1   |
|                | <i>Chlorocebus sabaeus</i>    | 3       | XM_007973474.1   |
|                |                               | 4       | XM_007973482.1   |
|                |                               | 5       | XM_007973405.1   |
|                |                               | 1       | XM_012031534.1   |
|                |                               | 2       | XM_012031541.1   |
|                | <i>Cercocebus atys</i>        | 3       | XM_012031557.1   |
|                |                               | 4       | XM_012031550.1   |
|                |                               | 5       | XM_012076101.1   |
|                |                               | 1       | L26164.1         |
|                |                               | 2       | z46227           |
|                | <i>Mus musculus</i>           | 3       | Z381281.1        |
|                |                               | 4       | L26163.1         |
|                |                               | 5       | Z46227.1         |
|                |                               | 1       | NM_001106113.1   |
|                |                               | 2       | XM_001071565.2   |
|                | <i>Rattus norvegicus</i>      | 3       | M31229.1         |
|                |                               | 4       | X67320.1         |
|                |                               | 5       | NM_001109417.1   |
|                |                               | 1       | XM_005066469.2   |
|                |                               | 2       | XM_005066464.2   |
|                | <i>Mesocricetus auratus</i>   | 3       | XM_013110574.1   |
|                |                               | 4       | XM_005066470.2   |
|                |                               | 5       | XM_005066676.1   |
| Rodentia       |                               | 1       | XM_006993141.1   |
|                |                               | 2       | XM_006993149.1   |
|                | <i>Peromyscus maniculatus</i> | 3       | XM_006993163.1   |
|                |                               | 4       | XM_006993156.1   |
|                |                               | 5       | XM_006988862.1   |
|                |                               | 1       | XM_005354954.2   |
|                |                               | 2       | XM_005354949.2   |
|                | <i>Microtus ochrogaster</i>   | 3       | XM_005354946.2   |
|                |                               | 4       | XM_005354943.2   |
|                |                               | 5       | XM_005369908.2   |
|                |                               | 1       | XM_008831889.1   |
|                |                               | 3       | XM_008831856.1   |
|                | <i>Nannospalax gallii</i>     | 4       | XM_008831872.1   |
|                |                               | 5       | XM_008826638.1   |
|                |                               | 1       | XM_004670840.1   |
|                | <i>Jaculus jaculus</i>        | 5       | XM_004670829.1   |
|                |                               | 1       | XM_001252377.3   |
|                |                               | 2       | NM_001083425     |
|                | <i>Bos taurus</i>             | 3       | NM_001101066.1   |
|                |                               | 4       | XM_870179.5      |
|                |                               | 5       | XM_010818459.1   |
|                |                               | 1       | XM_006182196.1   |
|                |                               | 2       | XM_006182177.1   |
| Artiodactyla   | <i>Camelus ferus</i>          | 3       | XM_006182164.1   |
|                |                               | 4       | XM_006182173.1   |
|                |                               | 5       | XM_006194163.1   |
|                |                               | 1       | XM_010843447.1   |
|                |                               | 2       | XM_010843443.1   |
|                | <i>Bison bison</i>            | 3       | XM_010843422.1   |
|                |                               | 4       | XM_010843433.1   |
|                |                               | 5       | XM_010834036.1   |
|                |                               | 1       | XM_545380.2      |
|                |                               | 2       | XM_005640102.1   |
|                | <i>Canis lupus familiaris</i> | 3       | XM_005640112.1   |
|                |                               | 4       | XM_545391.2      |
|                |                               | 5       | XM_545427.4      |
| Carnivora      |                               | 1       | XM_006913397.2   |
|                |                               | 2       | XM_003985723.3   |
|                | <i>Felis catus</i>            | 3       | XM_003985709.3   |
|                |                               | 4       | XM_003985718.3   |
|                |                               | 5       | XM_003985686.1   |
|                |                               | 1       | XM_004273503.1   |
|                |                               | 2       | XM_004273490.2   |
|                | <i>Orcinus Orca</i>           | 3       | XM_004273472.2   |
|                |                               | 4       | XM_004273489.2   |
|                |                               | 5       | XM_012539194.1   |
| Cetacea        |                               | 1       | XM_007471242.1   |
|                |                               | 2       | XM_007471233.1   |
|                | <i>Lipotes vexillifer</i>     | 3       | XM_007471246.1   |
|                |                               | 4       | XM_007471225.1   |
|                |                               | 5       | XM_007449250.1   |
|                |                               | 1       | XM_001496648.1   |
|                |                               | 2       | XM_005603619.1   |
| Perissodactyla | <i>Equus caballus</i>         | 3       | XM_005603627.1   |
|                |                               | 4       | XM_001916031.3   |
|                |                               | 5       | XM_001505032.2   |
|                |                               | 1       | XM_004694872.1   |
|                |                               | 2       | XM_004694866.1   |
|                | <i>Condylura cristata</i>     | 3       | XM_004694854.1   |
|                |                               | 4       | XM_004694861.2   |
|                |                               | 5       | XM_004694823.1   |
|                |                               | 1       | XM_006923490.2   |
|                |                               | 2       | XM_006923482.1   |
| Chiroptera     | <i>Pteropus alecto</i>        | 3       | XM_006923470.1   |
|                |                               | 4       | XM_006923477.1   |
|                |                               | 5       | XM_006923450.1   |
|                |                               | 1       | XM_008587631.1   |
|                |                               | 2       | XM_008587623.1   |
|                | <i>Galeopterus variegatus</i> | 3       | XM_008587844.1   |
|                |                               | 4       | XM_008587616.1   |
|                |                               | 5       | XM_008581933.1   |
|                |                               | 1       | XM_004463490.1   |
|                |                               | 2       | XM_004463497.1   |
| Cingulata      | <i>Dasypus novemcinctus</i>   | 3       | XM_004463518.2   |
|                |                               | 5       | XM_004481848.2   |

**Table S2. Assessment of the multiple alignment quality**

| Multiple alignment                    | SP-score |          |        |
|---------------------------------------|----------|----------|--------|
|                                       | NAFTT    | PROBCONS | MUSCLE |
| ClustalW alignment (130 H1 sequences) | 0.945    | 0.950    | 0.948  |
| Curated alignment (130 H1 sequences)  | 0.951    | 0.956    | 0.954  |
| Peptidase M13 (reference alignment)   | 0.879    | 0.885    | 0.882  |
| SH2 (reference alignment)             | 0.895    | 0.902    | 0.741  |

The scores were calculated at <http://www.mtt.fi/AlignmentQuality/> as described by Ahola et al., 2008. The scores of two reference sequence alignments are shown for additional comparison.

**Table S3. Nucleotide substitution models used for phylogenetic tree reconstruction**

| Analysis                    | Dataset   | Number of sequences | Number of parameters | Base frequency |         |         |         | I     | $\alpha$ | Model Selected |
|-----------------------------|-----------|---------------------|----------------------|----------------|---------|---------|---------|-------|----------|----------------|
|                             |           |                     |                      | A              | C       | G       | T       |       |          |                |
| Branch-analysis             | H1.1-H1.5 | 130                 | 261                  | 0.200          | 0.300   | 0.300   | 0.200   | 0.26  | 0.87     | T92+G+I        |
|                             | H1.1.1    | 27                  | 60                   | 0.16828        | 0.33586 | 0.3277  | 0.16816 | 0     | 0.679    | GTR+G          |
|                             | H1.1.2    | 27                  | 60                   | 0.26922        | 0.22752 | 0.34046 | 0.1628  | 0     | 0.346    | GTR+G          |
|                             | H1.1.3    | 27                  | 60                   | 0.33274        | 0.26045 | 0.28563 | 0.12118 | 0     | 0.682    | GTR+G          |
|                             | H1.2.1    | 25                  | 56                   | 0.17403        | 0.32254 | 0.34353 | 0.1599  | 0     | 0.264    | GTR+G          |
|                             | H1.2.2    | 25                  | 56                   | 0.26901        | 0.24393 | 0.31572 | 0.17133 | 0     | 0.328    | GTR+G          |
|                             | H1.2.3    | 25                  | 56                   | 0.34803        | 0.28556 | 0.3018  | 0.3018  | 0     | 0.52     | GTR+G          |
| Site-specific by partitions | H1.3.1    | 26                  | 58                   | 0.20155        | 0.28513 | 0.34417 | 0.16915 | 0     | 0.363    | GTR+G          |
|                             | H1.3.2    | 26                  | 58                   | 0.29179        | 0.22876 | 0.30547 | 0.17397 | 0     | 0.276    | GTR+G          |
|                             | H1.3.3    | 26                  | 58                   | 0.35821        | 0.26518 | 0.29305 | 0.08357 | 0     | 0.788    | GTR+G          |
|                             | H1.4.1    | 25                  | 56                   | 0.24629        | 0.29227 | 0.32805 | 0.1334  | 0     | 0.269    | GTR+G          |
|                             | H1.4.2    | 25                  | 56                   | 0.34132        | 0.29014 | 0.31105 | 0.05749 | 0     | 0.277    | GTR+G          |
|                             | H1.5.1    | 27                  | 60                   | 0.19935        | 0.3046  | 0.3353  | 0.16075 | 0     | 0.277    | GTR+G          |
|                             | H1.5.2    | 27                  | 60                   | 0.28251        | 0.24912 | 0.31444 | 0.15394 | 0     | 0.339    | GTR+G          |
|                             | H1.5.3    | 27                  | 60                   | 0.33394        | 0.25563 | 0.32202 | 0.08841 | 0     | 0.333    | GTR+G          |
|                             | H1.1 NTD  | 27                  | 60                   | 0.24021        | 0.34748 | 0.28003 | 0.13228 | 0.0   | 1176     | GTR+G          |
|                             | H1.1 GD   | 27                  | 61                   | 0.20819        | 0.28886 | 0.32826 | 0.17470 | 0.337 | 0.794    | GTR+G+I        |
|                             | H1.1 CTD  | 27                  | 61                   | 0.36162        | 0.26531 | 0.27593 | 0.09715 | 0.223 | 1444     | GTR+G+I        |
|                             | H1.2 NTD  | 25                  | 57                   | 0.18667        | 0.37750 | 0.33000 | 0.10583 | 0.400 | 0.916    | GTR+G+I        |
|                             | H1.2 GD   | 25                  | 56                   | 0.22123        | 0.29614 | 0.31982 | 0.16281 | 0.0   | 0.199    | GTR+G          |
|                             | H1.2 CTD  | 25                  | 57                   | 0.32870        | 0.28465 | 0.31813 | 0.06852 | 0.223 | 0.951    | GTR+G+I        |
| Site-specific by domains    | H1.3 NTD  | 26                  | 59                   | 0.26433        | 0.29396 | 0.30214 | 0.13957 | 0.283 | 2651     | GTR+G+I        |
|                             | H1.3 GD   | 26                  | 58                   | 0.22318        | 0.30128 | 0.31579 | 0.15975 | 0.0   | 0.239    | GTR+G          |
|                             | H1.3 CTD  | 26                  | 58                   | 0.34112        | 0.28963 | 0.30730 | 0.06195 | 0.0   | 0.798    | GTR+G          |
|                             | H1.4 NTD  | 25                  | 57                   | 0.19983        | 0.39132 | 0.32666 | 0.08219 | 0.538 | 2311     | GTR+G+I        |
|                             | H1.4 GD   | 25                  | 57                   | 0.21772        | 0.30684 | 0.31982 | 0.15561 | 0.595 | 3502     | GTR+G+I        |
|                             | H1.4 CTD  | 25                  | 56                   | 0.36693        | 0.29051 | 0.30810 | 0.03445 | 0.0   | 0.344    | GTR+G          |
|                             | H1.5 NTD  | 27                  | 61                   | 0.25072        | 0.32681 | 0.32174 | 0.10072 | 0.471 | 1800     | GTR+G+I        |
|                             | H1.5 GD   | 27                  | 61                   | 0.22466        | 0.29711 | 0.31189 | 0.16634 | 0.588 | 3821     | GTR+G+I        |
|                             | H1.5 CTD  | 27                  | 61                   | 0.34656        | 0.28108 | 0.30829 | 0.06407 | 0.280 | 0.597    | GTR+G+I        |

The best nucleotide substitution model for each alignment was calculated with jModelTest using maximum likelihood methods (Posada, 2008). I, proportion of invariable sites;  $\alpha$ , gamma shape. The H1.1-H1.5 dataset includes the 130 sequences analyzed in this study. Phylogenetic trees were also reconstructed when the sequences were analyzed by partitions, taking into account the recombination breakpoints and when the sequences were analyzed by structural domains: N-terminal domain (NTD), globular domain (GD) and C-terminal domain (CTD).

Table S4. Frequency of indels in the 130 protein sequences of the H1.1-H1.5 subtypes

| Subtype                                                                                                                                                                                                                                                                                                                                                                                                  | H1.1    |          |         |         |         |         | H1.2     |         |         |         |         |          | H1.3    |         |         |         |          |         | H1.4    |         |         |          |         |         | H1.5    |        |  |  |  |  |
|----------------------------------------------------------------------------------------------------------------------------------------------------------------------------------------------------------------------------------------------------------------------------------------------------------------------------------------------------------------------------------------------------------|---------|----------|---------|---------|---------|---------|----------|---------|---------|---------|---------|----------|---------|---------|---------|---------|----------|---------|---------|---------|---------|----------|---------|---------|---------|--------|--|--|--|--|
|                                                                                                                                                                                                                                                                                                                                                                                                          | Species | Residues | PI      | FreqPI  | OI      | FreqOI  | Residues | PI      | FreqPI  | OI      | FreqOI  | Residues | PI      | FreqPI  | OI      | FreqOI  | Residues | PI      | FreqPI  | OI      | FreqOI  | Residues | PI      | FreqPI  | OI      | FreqOI |  |  |  |  |
| M. musculus<br>R. norvegicus<br>B. taurus<br>M. mulatta<br>H. sapiens<br>T. sylvatica<br>C. cristata<br>C. familiaris<br>P. alecto<br>O. garrettii<br>C. equus<br>G. variegatus<br>C. felis<br>P. troglodytes<br>C. ferus<br>B. bison<br>P. anubis<br>C. sabaeus<br>C. atlys<br>M. auratus<br>P. maniculatus<br>O. orca<br>L. vexillifer<br>M. ochrogaster<br>D. novemcinctus<br>N. gallii<br>J. jaculus | 212     | 7        | 0.03302 | 2       | 0.00943 | 211     | 4        | 0.01886 | 1       | 0.00474 | 220     | 1        | 0.00455 | 0       | 0.00000 | 218     | 2        | 0.00917 | 0       | 0.00000 | 222     | 6        | 0.02703 | 1       | 0.00450 |        |  |  |  |  |
|                                                                                                                                                                                                                                                                                                                                                                                                          | 213     | 7        | 0.03286 | 3       | 0.01408 | 211     | 4        | 0.01886 | 1       | 0.00474 | 220     | 1        | 0.00455 | 1       | 0.00455 | 218     | 2        | 0.00917 | 0       | 0.00000 | 221     | 5        | 0.02262 | 2       | 0.00905 |        |  |  |  |  |
|                                                                                                                                                                                                                                                                                                                                                                                                          | 217     | 6        | 0.02765 | 1       | 0.00461 | 212     | 4        | 0.01887 | 0       | 0.00000 | 220     | 1        | 0.00455 | 0       | 0.00000 | 218     | 2        | 0.00917 | 0       | 0.00000 | 225     | 6        | 0.02867 | 0       | 0.00000 |        |  |  |  |  |
|                                                                                                                                                                                                                                                                                                                                                                                                          | 214     | 6        | 0.02804 | 2       | 0.00935 | 212     | 4        | 0.01887 | 0       | 0.00000 | 220     | 1        | 0.00455 | 0       | 0.00000 | 218     | 2        | 0.00917 | 0       | 0.00000 | 225     | 6        | 0.02867 | 0       | 0.00000 |        |  |  |  |  |
|                                                                                                                                                                                                                                                                                                                                                                                                          | 214     | 6        | 0.02804 | 2       | 0.00935 | 212     | 4        | 0.01887 | 0       | 0.00000 | 220     | 1        | 0.00455 | 0       | 0.00000 | 218     | 2        | 0.00917 | 0       | 0.00000 | 223     | 6        | 0.02891 | 1       | 0.00448 |        |  |  |  |  |
|                                                                                                                                                                                                                                                                                                                                                                                                          | 222     | 7        | 0.03153 | 2       | 0.00450 | 212     | 4        | 0.01887 | 0       | 0.00000 | 220     | 1        | 0.00455 | 0       | 0.00000 | 218     | 2        | 0.00917 | 0       | 0.00000 | 225     | 6        | 0.02867 | 0       | 0.00000 |        |  |  |  |  |
|                                                                                                                                                                                                                                                                                                                                                                                                          | 222     | 6        | 0.02727 | 2       | 0.00909 | 211     | 4        | 0.01886 | 1       | 0.00474 | 217     | 1        | 0.00455 | 2       | 0.00922 | 218     | 2        | 0.00917 | 0       | 0.00000 | 225     | 6        | 0.02867 | 0       | 0.00000 |        |  |  |  |  |
|                                                                                                                                                                                                                                                                                                                                                                                                          | 214     | 7        | 0.03271 | 2       | 0.00935 | 212     | 4        | 0.01887 | 0       | 0.00000 | 219     | 1        | 0.00457 | 2       | 0.00922 | 218     | 2        | 0.00917 | 0       | 0.00000 | 225     | 6        | 0.02867 | 0       | 0.00000 |        |  |  |  |  |
|                                                                                                                                                                                                                                                                                                                                                                                                          | 210     | 6        | 0.02894 | 2       | 0.00935 | 212     | 4        | 0.01887 | 0       | 0.00000 | 219     | 1        | 0.00457 | 1       | 0.00457 | 218     | 2        | 0.00917 | 0       | 0.00000 | 225     | 6        | 0.02867 | 0       | 0.00000 |        |  |  |  |  |
|                                                                                                                                                                                                                                                                                                                                                                                                          | 210     | 6        | 0.02857 | 5       | 0.02361 | 212     | 4        | 0.01887 | 0       | 0.00000 | 219     | 1        | 0.00457 | 1       | 0.00457 | 218     | 2        | 0.00917 | 0       | 0.00000 | 223     | 6        | 0.02891 | 1       | 0.00448 |        |  |  |  |  |
|                                                                                                                                                                                                                                                                                                                                                                                                          | 216     | 7        | 0.03241 | 0       | 0.00000 | 212     | 4        | 0.01887 | 0       | 0.00000 | 210     | 1        | 0.00476 | 4       | 0.01905 | 218     | 2        | 0.00917 | 0       | 0.00000 | 225     | 6        | 0.02867 | 0       | 0.00000 |        |  |  |  |  |
|                                                                                                                                                                                                                                                                                                                                                                                                          | 213     | 7        | 0.03286 | 3       | 0.01408 | 212     | 4        | 0.01887 | 0       | 0.00000 | 221     | 1        | 0.00452 | 1       | 0.00452 | 217     | 2        | 0.00917 | 0       | 0.00000 | 225     | 6        | 0.02867 | 0       | 0.00000 |        |  |  |  |  |
|                                                                                                                                                                                                                                                                                                                                                                                                          | 215     | 7        | 0.03256 | 1       | 0.00465 | 212     | 4        | 0.01887 | 0       | 0.00000 | 220     | 1        | 0.00455 | 0       | 0.00000 | 218     | 2        | 0.00917 | 0       | 0.00000 | 224     | 5        | 0.02232 | 1       | 0.00446 |        |  |  |  |  |
|                                                                                                                                                                                                                                                                                                                                                                                                          | 214     | 6        | 0.02804 | 2       | 0.00935 | 212     | 4        | 0.01887 | 0       | 0.00000 | 220     | 1        | 0.00455 | 0       | 0.00000 | 218     | 2        | 0.00917 | 0       | 0.00000 | 225     | 6        | 0.02867 | 0       | 0.00000 |        |  |  |  |  |
|                                                                                                                                                                                                                                                                                                                                                                                                          | 217     | 6        | 0.02765 | 1       | 0.00461 | 212     | 4        | 0.01887 | 0       | 0.00000 | 220     | 1        | 0.00455 | 0       | 0.00000 | 217     | 2        | 0.00922 | 1       | 0.00461 | 225     | 6        | 0.02867 | 0       | 0.00000 |        |  |  |  |  |
|                                                                                                                                                                                                                                                                                                                                                                                                          | 214     | 6        | 0.02804 | 2       | 0.00935 | 212     | 4        | 0.01887 | 0       | 0.00000 | 220     | 1        | 0.00455 | 0       | 0.00000 | 218     | 2        | 0.00917 | 0       | 0.00000 | 225     | 6        | 0.02867 | 0       | 0.00000 |        |  |  |  |  |
|                                                                                                                                                                                                                                                                                                                                                                                                          | 213     | 6        | 0.02817 | 3       | 0.01408 | 212     | 4        | 0.01887 | 0       | 0.00000 | 220     | 1        | 0.00455 | 0       | 0.00000 | 218     | 2        | 0.00917 | 0       | 0.00000 | 225     | 6        | 0.02867 | 0       | 0.00000 |        |  |  |  |  |
|                                                                                                                                                                                                                                                                                                                                                                                                          | 212     | 7        | 0.03302 | 2       | 0.00943 | 210     | 4        | 0.01905 | 2       | 0.00952 | 219     | 1        | 0.00457 | 1       | 0.00457 | 218     | 2        | 0.00917 | 0       | 0.00000 | 220     | 5        | 0.02273 | 3       | 0.01364 |        |  |  |  |  |
|                                                                                                                                                                                                                                                                                                                                                                                                          | 212     | 7        | 0.03302 | 2       | 0.00943 | 211     | 4        | 0.01886 | 1       | 0.00474 | 220     | 1        | 0.00455 | 0       | 0.00000 | 218     | 2        | 0.00917 | 0       | 0.00000 | 225     | 6        | 0.02867 | 1       | 0.00444 |        |  |  |  |  |
|                                                                                                                                                                                                                                                                                                                                                                                                          | 217     | 6        | 0.02765 | 1       | 0.00461 | 212     | 4        | 0.01887 | 0       | 0.00000 | 220     | 1        | 0.00455 | 0       | 0.00000 | 218     | 2        | 0.00917 | 0       | 0.00000 | 225     | 6        | 0.02867 | 0       | 0.00000 |        |  |  |  |  |
|                                                                                                                                                                                                                                                                                                                                                                                                          | 216     | 6        | 0.02778 | 2       | 0.00926 | 212     | 4        | 0.01887 | 0       | 0.00000 | 220     | 1        | 0.00455 | 0       | 0.00000 | 218     | 2        | 0.00917 | 0       | 0.00000 | 225     | 6        | 0.02867 | 0       | 0.00000 |        |  |  |  |  |
| 213                                                                                                                                                                                                                                                                                                                                                                                                      | 7       | 0.03286  | 3       | 0.01408 | 211     | 4       | 0.01886  | 1       | 0.00474 | 220     | 1       | 0.00455  | 0       | 0.00000 | 218     | 2       | 0.00917  | 0       | 0.00000 | 224     | 6       | 0.02703  | 1       | 0.00450 |         |        |  |  |  |  |
| 215                                                                                                                                                                                                                                                                                                                                                                                                      | 7       | 0.03256  | 1       | 0.00465 | 211     | 4       | 0.01886  | 1       | 0.00474 | 220     | 1       | 0.00455  | 0       | 0.00000 | 219     | 1       | 0.00455  | 1       | 0.00457 | 224     | 6       | 0.02703  | 1       | 0.00446 |         |        |  |  |  |  |
| 211                                                                                                                                                                                                                                                                                                                                                                                                      | 6       | 0.02844  | 4       | 0.01896 | 207     | 3       | 0.01449  | 3       | 0.01449 | 219     | 1       | 0.00459  | 2       | 0.00457 | 218     | 2       | 0.00917  | 0       | 0.00000 | 222     | 6       | 0.02679  | 1       | 0.00450 |         |        |  |  |  |  |
| 214                                                                                                                                                                                                                                                                                                                                                                                                      | 5       | 0.02336  | 4       | 0.01869 | average | 0.02970 | average  | 0.01872 | 0.00191 | average | 0.00456 | 0.00249  | average | 0.00918 | 0.00055 | average | 0.02628  | 0.02679 | 0.00461 | 0.00448 | average | 0.02628  | 0.02679 | 0.00461 | 0.00448 |        |  |  |  |  |
|                                                                                                                                                                                                                                                                                                                                                                                                          |         |          |         |         |         |         |          |         |         |         |         |          |         |         |         |         |          |         |         |         |         |          |         |         |         |        |  |  |  |  |

The indels were counted from the global H1.1-H1.5 alignment. Indels present only in paralog comparisons are referred to as paralog indels (PI). Indels present only in ortholog comparisons are referred to as ortholog indels (OI). All the indels were counted only once as explained in the Materials and Method section. The frequency was calculated as the total number of each type of indel present in each protein sequence divided by the number of residues. P-values were calculated with a Mann-Whitney U-test and correspond to the probability that the ortholog and paralog indel frequencies are the same for each subtype. \*\*, very significant, \*\*\* extremely significant.



Table S5. Positive selection detection in mammalian H1.1-H1.5 gene-family using branch-site methods

| Software | Foreground branches | Parameter estimates                                                                 | InL    | LRT   | p-value      | Positively selected sites (PSS) <sup>a</sup>                                                                                                        |
|----------|---------------------|-------------------------------------------------------------------------------------|--------|-------|--------------|-----------------------------------------------------------------------------------------------------------------------------------------------------|
| PAML     | H1.1                | MA1: $p_0=0.77453$ , $p_1=0.09771$ , $p_{2a}=0.11345$ , $p_{2b}=0.01431$            | -22758 | 23.39 | 0.00000132   | <b>20(0.99677)</b> , <b>39(0.99917)</b> , <b>51(0.99090)</b> <b>125(0.99339)</b> <b>136(0.98696)</b> , <b>178(0.99759)</b>                          |
|          |                     | FG: $\omega_0=0.05829$ , $\omega_1=1.0$ , $\omega_2=1.0$                            | -22746 |       |              |                                                                                                                                                     |
|          |                     | MA: $p_0=0.79614$ , $p_1=0.1000$ , $p_{2a}=0.09227$ , $p_{2b}=0.01159$              | -22537 |       |              |                                                                                                                                                     |
|          | H1.2                | MA1: $p_0=0.28625$ , $p_1=0.05408$ , $p_{2a}=0.55484$ , $p_{2b}=0.10482$            | -22528 | 17.62 | 0.00002697   | none                                                                                                                                                |
|          |                     | FG: $\omega_0=0.09829$ , $\omega_1=1.0$ , $\omega_2=1.0$                            | -22542 |       |              |                                                                                                                                                     |
|          |                     | MA: $p_0=0.81330$ , $p_1=0.15874$ , $p_{2a}=0.02872$ , $p_{2b}=0.00539$             | -22544 |       |              |                                                                                                                                                     |
|          | H1.3                | MA1: $p_0=0.63170$ , $p_1=0.12550$ , $p_{2a}=0.20255$ , $p_{2b}=0.04024$            | -22544 | 9.94  | 0.00161726   | none                                                                                                                                                |
|          |                     | FG: $\omega_0=0.09799$ , $\omega_1=1.0$ , $\omega_2=1.0$                            | -22537 |       |              |                                                                                                                                                     |
|          |                     | MA: $p_0=0.82179$ , $p_1=0.16175$ , $p_{2a}=0.01375$ , $p_{2b}=0.00271$             | -22544 |       |              |                                                                                                                                                     |
|          | H1.4                | MA1: $p_0=0.80905$ , $p_1=0.15974$ , $p_{2a}=0.02606$ , $p_{2b}=0.00515$            | -22542 | 3.93  | 0.04743194   | none                                                                                                                                                |
|          |                     | FG: $\omega_0=0.09862$ , $\omega_1=1.0$ , $\omega_2=1.0$                            | -22544 |       |              |                                                                                                                                                     |
|          |                     | MA: $p_0=0.83357$ , $p_1=0.15849$ , $p_{2a}=0.00667$ , $p_{2b}=0.00127$             | -22544 |       |              |                                                                                                                                                     |
|          | H1.5                | MA1: $p_0=0.78606$ , $p_1=0.15558$ , $p_{2a}=0.04871$ , $p_{2b}=0.00964$            | -22544 | 0.032 | 0.85802766   | N.A                                                                                                                                                 |
|          |                     | FG: $\omega_0=0.09839$ , $\omega_1=1.0$ , $\omega_2=1.0$                            | -22544 |       |              |                                                                                                                                                     |
|          |                     | MA: $p_0=0.80051$ , $p_1=0.15848$ , $p_{2a}=0.03424$ , $p_{2b}=0.00678$             | -22544 |       |              |                                                                                                                                                     |
| BUSTED   | H1.1                | Null: BG: $\omega_1=0.0435$ (97%), $\omega_2=0.684$ (2.5%), $\omega_3=14.6$ (0.31%) | -16255 | 17.56 | 0.000152997  | <b>20(0.0006)</b> , <b>39(0.002)</b> , 41(0.04), <b>51(0.003)</b> , <b>125(0.02)</b> , 131(0.01), <b>136(0.003)</b> , <b>178(0.001)</b> , 214(0.02) |
|          |                     | FG: $\omega_1=0.00$ (74%), $\omega_2=0.919$ (0.0%), $\omega_3=1.00$ (26%)           | -16246 |       |              |                                                                                                                                                     |
|          |                     | Sel: BG: $\omega_1=0.0429$ (97%), $\omega_2=0.742$ (2.6%), $\omega_3=15.2$ (0.28%)  | -22292 |       |              |                                                                                                                                                     |
|          | H1.2                | Null: BG: $\omega_1=0.0570$ (97%), $\omega_2=0.691$ (2.8%), $\omega_3=11.0$ (0.48%) | -22285 | 12.62 | 0.001816797  | -                                                                                                                                                   |
|          |                     | FG: $\omega_1=1.00$ (48%), 0.888 (0.0%), 1.00 (52%)                                 | -22290 |       |              |                                                                                                                                                     |
|          |                     | Sel: BG: $\omega_1=0.0569$ (97%), $\omega_2=0.750$ (2.8%), $\omega_3=424$ (2.5%)    | -22287 |       |              |                                                                                                                                                     |
|          | H1.3                | Null: BG: $\omega_1=0.104$ (90%), $\omega_2=0.998$ (7.4%), $\omega_3=27.1$ (1.7%)   | -22291 | 7.14  | 0.028128288  | -                                                                                                                                                   |
|          |                     | FG: $\omega_1=0.0558$ (96%), $\omega_2=0.657$ (3.3%), $\omega_3=12.4$ (0.45%)       | -22287 |       |              |                                                                                                                                                     |
|          |                     | Sel: BG: $\omega_1=0.0421$ (0.0%), $\omega_2=0.80$ (81%), $\omega_3=1.00$ (19%)     | -22291 |       |              |                                                                                                                                                     |
|          | H1.4                | Null: BG: $\omega_1=0.0485$ (93%), $\omega_2=0.479$ (6.2%), $\omega_3=12.9$ (0.44%) | -22288 | 6.12  | 0.046669824  | -                                                                                                                                                   |
|          |                     | FG: $\omega_1=0.159$ (87%), $\omega_2=0.215$ (12%), $\omega_3=10000$ (1.3%)         | -22287 |       |              |                                                                                                                                                     |
|          |                     | Sel: BG: $\omega_1=0.0576$ (97%), $\omega_2=0.737$ (2.6%), $\omega_3=12.4$ (0.45%)  | -22287 |       |              |                                                                                                                                                     |
|          | H1.5                | Null: BG: $\omega_1=0.00$ (91%), 0.002 (1.0%), 1.00 (8.2%)                          | -22283 | 8.08  | 0.0174845489 | -                                                                                                                                                   |
|          |                     | FG: $\omega_1=0.0534$ (95%), $\omega_2=0.586$ (4.2%), $\omega_3=12.5$ (0.45%)       | -22288 |       |              |                                                                                                                                                     |
|          |                     | Sel: BG: $\omega_1=0.00$ (93%), $\omega_2=0.002$ (5.1%), $\omega_3=27.1$ (1.7%)     | -22287 |       |              |                                                                                                                                                     |
|          |                     | FG: $\omega_1=0.0576$ (97%), $\omega_2=0.772$ (2.5%), $\omega_3=12.9$ (0.43%)       |        |       |              |                                                                                                                                                     |
|          |                     | FG: $\omega_1=0.00$ (34%), $\omega_2=0.905$ (0.0%), $\omega_3=1.00$ (66%)           |        |       |              |                                                                                                                                                     |
|          |                     | Sel: BG: $\omega_1=0.0556$ (96%), $\omega_2=0.659$ (3.3%), $\omega_3=13.3$ (0.43%)  |        |       |              |                                                                                                                                                     |
|          |                     | FG: $\omega_1=0.230$ (84%), $\omega_2=0.774$ (12%), $\omega_3=925$ (4.0%)           |        |       |              |                                                                                                                                                     |

PAML analyses were performed using a maximum likelihood phylogenetic tree (Figure 2). Branches labeled in Figure 3 were used as foreground branches. The branch-site model A (MA), allowing sites with  $\omega > 1$  was compared with a null model that does not allowed for positive selection, using a likelihood ratio test (LRT). The proportion of sites in each category and the  $\omega$ -values for the foreground branch are shown. BUSTED was used as implemented at [datamonkey.org/busted](http://datamonkey.org/busted) using the paralog alignment. The model allowing positive selection (Sel) was compared with the Null model, using a LRT test. <sup>a</sup> in parenthesis the Bayes Empirical Bayes (BEB) posterior probabilities estimated by PAML or the p-values estimated by BUSTED are shown. PSS are reported in the selected branch (p-values < 0.001 in both analyses). Only those sites with a BEB posterior probability > 0.95 for PAML and a p-value < 0.05 for BUSTED are shown. In bold, sites that are confirmed by the two methods. The positions of the positively selected sites are referred to the multiple sequence alignment in Figure 1. N.A not allowed, as the null model was accepted. -, not calculated.

**Table S6. Positive selection analysis with the PAML site-models of mammalian H1.1-H1.5**

| Subtype | Partition | Model with positive selection |                                                                                                   |                                                                                                    | Null model                                                                                        |                                                                    |                                                                    | LRT                                                                | P-value                        | Positively selected sites                                                                               |     |
|---------|-----------|-------------------------------|---------------------------------------------------------------------------------------------------|----------------------------------------------------------------------------------------------------|---------------------------------------------------------------------------------------------------|--------------------------------------------------------------------|--------------------------------------------------------------------|--------------------------------------------------------------------|--------------------------------|---------------------------------------------------------------------------------------------------------|-----|
|         |           | Model                         | InL                                                                                               | Parameters                                                                                         | Model                                                                                             | InL                                                                | Parameters                                                         |                                                                    |                                |                                                                                                         |     |
| H1.1    | 1-52      | M3                            | -1769.39                                                                                          | $p_0=0.36490; p_1=0.30553; p_2=0.32957$<br>$\omega_0=0.02814; \omega_1=0.34716; \omega_2=0.34716$  | M0                                                                                                | -1787.88                                                           | $\omega=0.20499$                                                   | 36.98                                                              | <b>1.82E-07</b>                | none                                                                                                    |     |
|         |           | M2                            | -1786.32                                                                                          | $p_0=0.90476; p_1=0.06605; p_2=0.02919$<br>$\omega_0=0.18251; \omega_1=1.00000; \omega_2=1.00000$  | M1                                                                                                | -1786.32                                                           | $p_0=0.90476; p_1=0.09524$<br>$\omega_0=0.18251; \omega_1=1.00000$ | 0                                                                  | 1                              | N.A                                                                                                     |     |
|         |           | M8                            | -1772.02                                                                                          | $p_0=0.99999; p=0.88147; q=2.86509$<br>$(p_1=0.00001) \omega=2.92008$                              | M7                                                                                                | -1772.02                                                           | $p=0.88148; q=2.86511$                                             | -0.00125                                                           | 1                              | N.A                                                                                                     |     |
|         | 53-115    | M3                            | -960.94                                                                                           | $p_0=0.39047; p_1=0.48566; p_2=0.12387$<br>$\omega_0=0.01365; \omega_1=0.011365; \omega_2=0.14633$ | M0                                                                                                | -965.22                                                            | $\omega=0.02709$                                                   | 8.54                                                               | <b>0.073547</b>                | N.A                                                                                                     |     |
|         |           | M2                            | -965.22                                                                                           | $p_0=1.00000; p_1=0.00000; p_2=0.00000$<br>$\omega_0=0.02709; \omega_1=1.00000; \omega_2=1.00000$  | M1                                                                                                | -965.22                                                            | $p_0=0.99999; p_1=0.00001$<br>$\omega_0=0.02709; \omega_1=1.00000$ | 0.00096                                                            | 0.99952                        | N.A                                                                                                     |     |
|         |           | M8                            | -961.95                                                                                           | $p_0=0.99999; p=0.88147; q=2.86509$<br>$(p_1=0.00001) \omega=2.92008$                              | M7                                                                                                | -961.95                                                            | $p=0.88148; q=2.86511$                                             | -0.00105                                                           | 1                              | N.A                                                                                                     |     |
|         | 116-231   | M3                            | -3106.35                                                                                          | $p_0=0.24277; p_1=0.62201; p_2=0.13521$<br>$\omega_0=0.10262; \omega_1=0.53889; \omega_2=1.66986$  | M0                                                                                                | -3134.12                                                           | $\omega=0.53147$                                                   | 55.54                                                              | <b>2.51E-11</b>                | 121, 124, 125**, 127, 131, 136*, 153, 157, 187*                                                         |     |
|         |           | M2                            | -3109.03                                                                                          | $p_0=0.60737; p_1=0.34786; p_2=0.04477$<br>$\omega_0=0.25915; \omega_1=1.00000; \omega_2=2.21518$  | M1                                                                                                | -3110.55                                                           | $p_0=0.59453; p_1=0.40547$<br>$\omega_0=0.24403; \omega_1=1.00000$ | 3.04                                                               | 0.05515                        | N.A                                                                                                     |     |
|         |           | M8                            | -3106.73                                                                                          | $p_0=0.90339; p=1.26847; q=1.52416$<br>$(p_1=0.09661) \omega=1.83443$                              | M7                                                                                                | -3110.72                                                           | $p=0.81967; q=0.70183$                                             | 8.00                                                               | 0.01834                        | 124, 125*, 127, 136, 157, 187                                                                           |     |
|         | H1.2      | 1-48                          | M3                                                                                                | -939.85                                                                                            | $p_0=0.30837; p_1=0.58857; p_2=0.10306$<br>$\omega_0=0.02109; \omega_1=0.02109; \omega_2=0.49211$ | M0                                                                 | -954.76                                                            | $\omega=0.05996$                                                   | 29.82                          | <b>5.32E-06</b>                                                                                         | N.A |
|         |           |                               | M2                                                                                                | -942.26                                                                                            | $p_0=0.92522; p_1=0.07478; p_2=0.00000$<br>$\omega_0=0.02777; \omega_1=1.00000; \omega_2=1.00000$ | M1                                                                 | -942.26                                                            | $p_0=0.92522; p_1=0.07478$<br>$\omega_0=0.02777; \omega_1=1.00000$ | 0                              | 1                                                                                                       | N.A |
|         |           |                               | M8                                                                                                | -941.15                                                                                            | $p_0=0.99999; p=0.18222; q=2.08534$<br>$(p_1=0.00001) \omega=1.67482$                             | M7                                                                 | -941.15                                                            | $p=0.18222; q=2.08538$                                             | -0.00075                       | 1                                                                                                       | N.A |
| 49-121  |           | M3                            | -1181.56                                                                                          | $p_0=0.36682; p_1=0.50335; p_2=0.12982$<br>$\omega_0=0.00767; \omega_1=0.00767; \omega_2=0.29038$  | M0                                                                                                | -1196.48                                                           | $\omega=0.03047$                                                   | 29.85                                                              | <b>5.25E-06</b>                | none                                                                                                    |     |
|         |           | M2                            | -1187.34                                                                                          | $p_0=0.95000; p_1=0.04864; p_2=0.00136$<br>$\omega_0=0.01801; \omega_1=1.00000; \omega_2=1.00000$  | M1                                                                                                | -1187.34                                                           | $p_0=0.95000; p_1=0.05000$<br>$\omega_0=0.01801; \omega_1=1.00000$ | 0                                                                  | 1                              | N.A                                                                                                     |     |
|         |           | M8                            | -1181.99                                                                                          | $p_0=0.99999; p=0.11736; q=2.24592$<br>$(p_1=0.00001) \omega=1.00000$                              | M7                                                                                                | -1181.99                                                           | $p=0.11736; q=2.24568$                                             | -0.00061                                                           | 1                              | N.A                                                                                                     |     |
| 122-213 | M3        | -1812.17                      | $p_0=0.29607; p_1=0.64760; p_2=0.05633$<br>$\omega_0=0.12816; \omega_1=0.43868; \omega_2=1.46988$ | M0                                                                                                 | -1815.06                                                                                          | $\omega=0.36899$                                                   | 5.79                                                               | 0.215763                                                           | N.A                            |                                                                                                         |     |
|         | M2        | -1812.62                      | $p_0=0.85508; p_1=0.10284; p_2=0.04207$<br>$\omega_0=0.28915; \omega_1=1.00000; \omega_2=1.24249$ | M1                                                                                                 | -1812.63                                                                                          | $p_0=0.83565; p_1=0.16435$<br>$\omega_0=0.28239; \omega_1=1.00000$ | 0.01                                                               | 0.99369                                                            | N.A                            |                                                                                                         |     |
|         | M8        | -1812.28                      | $p_0=0.94660; p=2.54204; q=4.79463$<br>$(p_1=0.05340) \omega=1.44601$                             | M7                                                                                                 | -1812.58                                                                                          | $p=1.51608; q=2.31640$                                             | 0.59                                                               | 0.7427                                                             | N.A                            |                                                                                                         |     |
| H1.3    | 1-64      | M3                            | -1427.63                                                                                          | $p_0=0.71499; p_1=0.19879; p_2=0.05922$<br>$\omega_0=0.02175; \omega_1=0.34467; \omega_2=1.13951$  | M0                                                                                                | -1469.13                                                           | $\omega=0.12383$                                                   | 83.00                                                              | <b>4.02E-17</b>                | 9, 28*, 31*                                                                                             |     |
|         |           | M2                            | -1431.93                                                                                          | $p_0=0.83153; p_1=0.11816; p_2=0.05032$<br>$\omega_0=0.03877; \omega_1=1.00000; \omega_2=1.00000$  | M1                                                                                                | -1431.93                                                           | $p_0=0.83152; p_1=0.16848$<br>$\omega_0=0.03877; \omega_1=1.00000$ | 0                                                                  | 1                              | N.A                                                                                                     |     |
|         |           | M8                            | -1428.36                                                                                          | $p_0=0.97219; p=0.19379; q=1.24876$<br>$(p_1=0.02781) \omega=1.25867$                              | M7                                                                                                | -1428.77                                                           | $p=0.18712; q=1.02115$                                             | 0.82                                                               | 0.663915                       | N.A                                                                                                     |     |
|         | 65-110    | M3                            | -630.74                                                                                           | $p_0=0.93972; p_1=0.03595; p_2=0.02433$<br>$\omega_0=0.00839; \omega_1=0.00840; \omega_2=0.22890$  | M0                                                                                                | -631.35                                                            | $\omega=0.01037$                                                   | 1.24                                                               | 0.871551                       | N.A                                                                                                     |     |
|         |           | M2                            | -631.35                                                                                           | $p_0=1.00000; p_1=0.00000; p_2=0.00000$<br>$\omega_0=0.01037; \omega_1=1.00000; \omega_2=1.00000$  | M1                                                                                                | -631.36                                                            | $p_0=0.99999; p_1=0.00001$<br>$\omega_0=0.01037; \omega_1=1.00000$ | 0.000358                                                           | 0.999821                       | N.A                                                                                                     |     |
|         |           | M8                            | -631.26                                                                                           | $p_0=0.99999; p=0.57997; q=43.13267$<br>$(p_1=0.00001) \omega=86.80246$                            | M7                                                                                                | -631.19                                                            | $p=1.13586; q=99.00000$                                            | -0.15                                                              | 1                              | N.A                                                                                                     |     |
| 111-222 | M3        | -2766.21                      | $p_0=0.16848; p_1=0.76043; p_2=0.07109$<br>$\omega_0=0.04772; \omega_1=0.64346; \omega_2=1.75678$ | M0                                                                                                 | -2779.74                                                                                          | $\omega=0.53524$                                                   | 27.07                                                              | <b>1.93E-05</b>                                                    | 151, 157, 214                  |                                                                                                         |     |
|         | M2        | -2768.86                      | $p_0=0.35701; p_1=0.51658; p_2=0.12642$<br>$\omega_0=0.15071; \omega_1=1.00000; \omega_2=1.24249$ | M1                                                                                                 | -2768.86                                                                                          | $p_0=0.35701; p_1=0.64299$<br>$\omega_0=0.15071; \omega_1=1.00000$ | 0                                                                  | 1                                                                  | N.A                            |                                                                                                         |     |
|         | M8        | -2767.12                      | $p_0=0.97957; p=0.76486; q=0.50674$<br>$(p_1=0.02043) \omega=1.90160$                             | M7                                                                                                 | -2767.18                                                                                          | $p=0.71583; q=0.43860$                                             | 0.13                                                               | 0.936687                                                           | N.A                            |                                                                                                         |     |
| H1.4    | 1-140     | M3                            | -2305.78                                                                                          | $p_0=0.22457; p_1=0.56611; p_2=0.20932$<br>$\omega_0=0.00000; \omega_1=0.01017; \omega_2=0.20575$  | M0                                                                                                | -2318.62                                                           | $\omega=0.03998$                                                   | 25.67                                                              | <b>3.68E-05</b>                | none                                                                                                    |     |
|         |           | M2                            | -2312.19                                                                                          | $p_0=0.96144; p_1=0.03276; p_2=0.00579$<br>$\omega_0=0.02756; \omega_1=1.00000; \omega_2=1.00000$  | M1                                                                                                | -2312.19                                                           | $p_0=0.96144; p_1=0.03856$<br>$\omega_0=0.02756; \omega_1=1.00000$ | 0                                                                  | 1                              | N.A                                                                                                     |     |
|         |           | M8                            | -2305.67                                                                                          | $p_0=0.99999; p=0.18647; q=3.27993$<br>$(p_1=0.00001) \omega=1.35165$                              | M7                                                                                                | -2305.67                                                           | $p=0.18647; q=3.27981$                                             | -0.00122                                                           | 1                              | N.A                                                                                                     |     |
|         | 140-218   | M3                            | -1190.20                                                                                          | $p_0=0.56370; p_1=0.03958; p_2=0.39672$<br>$\omega_0=0.10563; \omega_1=0.10563; \omega_2=1.24083$  | M0                                                                                                | -1196.81                                                           | $\omega=0.53596$                                                   | 13.21                                                              | <b>0.010287</b>                | 149**, 151, 152**, 154, 157**, 160, 169, 172, 188, 191**, 194, 201, 202, 203, 209, 213**, 214, 230, 232 |     |
|         |           | M2                            | -1190.20                                                                                          | $p_0=0.60328; p_1=0.00000; p_2=0.39672$<br>$\omega_0=0.10563; \omega_1=1.00000; \omega_2=1.24082$  | M1                                                                                                | -1190.42                                                           | $p_0=0.49929; p_1=0.50071$<br>$\omega_0=0.05472; \omega_1=1.00000$ | 0.43                                                               | 0.806122                       | N.A                                                                                                     |     |
|         |           | M8                            | -1190.21                                                                                          | $p_0=0.60429; p=11.92795; q=99.00000$<br>$(p_1=0.39571) \omega=1.24171$                            | M7                                                                                                | -1190.50                                                           | $p=0.02748; q=0.02359$                                             | 0.59                                                               | 0.7436                         | N.A                                                                                                     |     |
| H1.5    | 1-53      | M3                            | -1202.65                                                                                          | $p_0=0.06362; p_1=0.76578; p_2=0.17060$<br>$\omega_0=0.01486; \omega_1=0.01486; \omega_2=0.32264$  | M0                                                                                                | -1218.63                                                           | $\omega=0.06133$                                                   | 31.96                                                              | <b>1.95E-06</b>                | none                                                                                                    |     |
|         |           | M2                            | -1212.51                                                                                          | $p_0=0.88977; p_1=0.10322; p_2=0.00701$<br>$\omega_0=0.02772; \omega_1=1.00000; \omega_2=1.00000$  | M1                                                                                                | -1212.51                                                           | $p_0=0.88977; p_1=0.11023$<br>$\omega_0=0.02772; \omega_1=1.00000$ | 0                                                                  | 1                              | N.A                                                                                                     |     |
|         |           | M8                            | -1203.62                                                                                          | $p_0=0.99999; p=0.20277; q=2.69826$<br>$(p_1=0.00001) \omega=1.00000$                              | M7                                                                                                | -1203.61                                                           | $p=0.20277; q=2.69821$                                             | -0.00068                                                           | 1                              | N.A                                                                                                     |     |
|         | 54-133    | M3                            | -1391.30                                                                                          | $p_0=0.47566; p_1=0.42878; p_2=0.09556$<br>$\omega_0=0.00000; \omega_1=0.07160; \omega_2=0.27972$  | M0                                                                                                | -1399.42                                                           | $\omega=0.04856$                                                   | 16.24                                                              | <b>0.002711</b>                | none                                                                                                    |     |
|         |           | M2                            | -1396.94                                                                                          | $p_0=0.96937; p_1=0.02915; p_2=0.00147$<br>$\omega_0=0.03950; \omega_1=1.00000; \omega_2=1.00000$  | M1                                                                                                | -1396.94                                                           | $p_0=0.96937; p_1=0.03063$<br>$\omega_0=0.03950; \omega_1=1.00000$ | 0                                                                  | 1                              | N.A                                                                                                     |     |
|         |           | M8                            | -1391.40                                                                                          | $p_0=0.99999; p=0.35114; q=5.45228$<br>$(p_1=0.00001) \omega=1.45537$                              | M7                                                                                                | -1391.40                                                           | $p=0.35114; q=5.45229$                                             | 0                                                                  | 1                              | N.A                                                                                                     |     |
| 133-225 | M3        | -2067.75                      | $p_0=0.27086; p_1=0.58430; p_2=0.14485$<br>$\omega_0=0.01022; \omega_1=0.25335; \omega_2=1.14689$ | M0                                                                                                 | -2079.16                                                                                          | $\omega=0.27133$                                                   | 22.83                                                              | <b>0.000137</b>                                                    | 149*, 151, 186, 187*, 214, 218 |                                                                                                         |     |
|         | M2        | -2068.83                      | $p_0=0.80304; p_1=0.12666; p_2=0.07031$<br>$\omega_0=0.14728; \omega_1=1.00000; \omega_2=1.00000$ | M1                                                                                                 | -2068.83                                                                                          | $p_0=0.80303; p_1=0.19697$<br>$\omega_0=0.14728; \omega_1=1.00000$ | 0                                                                  | 1                                                                  | N.A                            |                                                                                                         |     |
|         | M8        | -2068.08                      | $p_0=0.87268; p=0.96016; q=3.87603$<br>$(p_1=0.12732) \omega=1.13818$                             | M7                                                                                                 | -2068.44                                                                                          | $p=0.48386; q=1.10061$                                             | 0.72                                                               | 0.6964                                                             | N.A                            |                                                                                                         |     |

Considering the recombination breakpoints reported in the GARD analysis, the sequences were partitioned before running Codeml and a maximum likelihood phylogenetic tree was reconstructed for each partition with PhyML, using the best fitted nucleotide substitution model (Table S2). The model pairs compared in each partition were M0-M3; M1-M2 and M7-M8. InL, log likelihood; LRT, likelihood ratio test. In bold, p-values > 0.05, that allowed to accept the model with positive selection. Sites with posterior probability > 0.5 are listed; \*, posterior probability > 0.9; \*\*, posterior probability > 0.95. The positions of the positively selected sites are referred to the multiple sequence alignment in Figure 1. N.A., not allowed, as the null model was accepted.

**Table S7. Analysis of variance (ANOVA) of the averaged omega ratios by domains.**

| Subtype | Parameters | NTD    | GD     | CTD    | Source of variation | Degrees of freedom | Sum of squares | Mean square | F-value | p-value | Tukey HSD test |                |
|---------|------------|--------|--------|--------|---------------------|--------------------|----------------|-------------|---------|---------|----------------|----------------|
|         |            |        |        |        |                     |                    |                |             |         |         | Compared means | Significance   |
| H1.1    | Mean       | 0.2907 | 0.0537 | 0.587  | Between domains     | 2                  | 12.7511        | 6.3755      |         |         | NTD vs GD      | p< 0.01        |
|         | Variance   | 0.0194 | 0.0044 | 0.1169 | Within domains      | 214                | 13.2683        | 0.0620      | 102.83  | <0.0001 | NTD vs CTD     | p< 0.01        |
|         |            |        |        |        |                     |                    |                |             |         |         | GD vs CTD      | p< 0.01        |
| H1.2    | Mean       | 0.0943 | 0.0239 | 0.362  | Between domains     | 2                  | 5.4445         | 2.7222      |         |         | NTD vs GD      | p< 0.01        |
|         | Variance   | 0.0135 | 0.0012 | 0.018  | Within domains      | 209                | 2.3335         | 0.0112      | 243.81  | <0.0001 | NTD vs CTD     | p< 0.01        |
|         |            |        |        |        |                     |                    |                |             |         |         | GD vs CTD      | p< 0.01        |
| H1.3    | Mean       | 0.2319 | 0.0334 | 0.6180 | Between domains     | 2                  | 16.0360        | 8.018       |         |         | NTD vs GD      | p< 0.01        |
|         | Variance   | 0.0607 | 0.0043 | 0.0383 | Within domains      | 217                | 6.4784         | 0.0298      | 268.57  | <0.0001 | NTD vs CTD     | p< 0.01        |
|         |            |        |        |        |                     |                    |                |             |         |         | GD vs CTD      | p< 0.01        |
| H1.4    | Mean       | 0.0552 | 0.0274 | 0.4062 | Between domains     | 2                  | 7.5035         | 3.7518      |         |         | NTD vs GD      | nonsignificant |
|         | Variance   | 0.0050 | 0.0007 | 0.0924 | Within domains      | 215                | 10.2864        | 0.0478      | 78.42   | <0.0001 | NTD vs CTD     | p< 0.01        |
|         |            |        |        |        |                     |                    |                |             |         |         | GD vs CTD      | p< 0.01        |
| H1.5    | Mean       | 0.0801 | 0.0431 | 0.2641 | Between domains     | 2                  | 2.4959         | 1.2479      |         |         | NTD vs GD      | nonsignificant |
|         | Variance   | 0.0102 | 0.0027 | 0.0306 | Within domains      | 222                | 3.9999         | 0.018       | 69.26   | <0.0001 | NTD vs CTD     | p< 0.01        |
|         |            |        |        |        |                     |                    |                |             |         |         | GD vs CTD      | p< 0.01        |

The omega ratios per residue resultant of the accepted model from the pair M7-M8 were averaged by domains. The analysis of variance was performed at <http://vassarstats.net/>. The Tukey HSD test was performed to do a pairwise comparison of the means by domain

Table S8. Positive selection analysis with PAML site-models of the individual domains of mammalian H1.1-H1.5

| Subtype | Partition | Model with positive selection |                                                                                                                |            | Null model |                                                                             |            | LRT             | P-value                                         | Positively selected sites |
|---------|-----------|-------------------------------|----------------------------------------------------------------------------------------------------------------|------------|------------|-----------------------------------------------------------------------------|------------|-----------------|-------------------------------------------------|---------------------------|
|         |           | Model                         | InL                                                                                                            | Parameters | Model      | InL                                                                         | Parameters |                 |                                                 |                           |
| NTD     | M3        | -1394.70                      | $p_0 = 0.17839; p_1 = 0.76263; p_2 = 0.05898$<br>$\omega_0 = 0.02746; \omega_1 = 0.51075; \omega_2 = 1.34945$  | M0         | -1411.00   | $\omega = 0.39503$                                                          | 32.27      | <b>1.68E-06</b> | 13                                              |                           |
|         | M2        | -1403.30                      | $p_0 = 0.53611; p_1 = 0.41159; p_2 = 0.05230$<br>$\omega_0 = 0.21139; \omega_1 = 1.00000; \omega_2 = 1.00000$  | M1         | -1403.30   | $p_0 = 0.53611; p_1 = 0.46389$<br>$\omega_0 = 0.21139; \omega_1 = 1.00000$  | 0          | 1               | N.A                                             |                           |
|         | M8        | -1396.60                      | $p_0 = 0.99999; p = 0.83561; q = 0.90082$<br>$(p1 = 0.00001) \omega = 1.00000$                                 | M7         | -1397.00   | $p = 0.83561; q = 0.90080$                                                  | -0.40      | 1               | N.A                                             |                           |
| H1.1    | M3        | -1320.22                      | $p_0 = 0.42141; p_1 = 0.42457; p_2 = 0.15401$<br>$\omega_0 = 0.01337; \omega_1 = 0.01337; \omega_2 = 0.12319$  | M0         | -1325.00   | $\omega = 0.02772$                                                          | 10.13      | 0.0383          | N.A                                             |                           |
|         | M2        | -1325.28                      | $p_0 = 1.00000; p_1 = 0.00000; p_2 = 0.00000; \omega_0 = 0.02772; \omega_1 = 1.00000; \omega_2 = 1.00000$      | M1         | -1325.04   | $p_0 = 0.99999; p_1 = 0.00001$<br>$\omega_0 = 0.02772; \omega_1 = 1.00000$  | 0          | 0.9994          | N.A                                             |                           |
|         | M8        | -961.95                       | $p_0 = 0.99999; p = 0.55239; q = 17.00464$<br>$(p1 = 0.00001) \omega = 1.00000$                                | M7         | -1321.00   | $p = 0.55239; q = 17.00463$                                                 | 0          | 1               | N.A                                             |                           |
| CTD     | M3        | -3126.54                      | $p_0 = 0.25601; p_1 = 0.61834; p_2 = 0.12565$<br>$\omega_0 = 0.10317; \omega_1 = 0.58190; \omega_2 = 1.75727$  | M0         | -3155.00   | $\omega = 0.55344$                                                          | 57.25      | <b>1.10E-11</b> | 124, 130, 131**, 133, 137, 143*, 159, 163, 188* |                           |
|         | M2        | -3109.03                      | $p_0 = 0.60737; p_1 = 0.34786; p_2 = 0.04477$<br>$\omega_0 = 0.25915; \omega_1 = 1.00000; \omega_2 = 2.21518$  | M1         | -3131.55   | $p_0 = 0.55409; p_1 = 0.44591$<br>$\omega_0 = 0.23332; \omega_1 = 1.00000$  | 3.43       | 0.1798          | N.A                                             |                           |
|         | M8        | -3106.73                      | $p_0 = 0.90881; p = 1.13701; q = 1.24024$<br>$(p1 = 0.09119) \omega = 1.91401$                                 | M7         | -3131.72   | $p = 0.76174; q = 0.60865$                                                  | 8.08       | <b>0.01782</b>  | 130, 131*, 133, 143, 163, 188                   |                           |
| NTD     | M3        | -690.58                       | $p_0 = 0.32827; p_1 = 0.53262; p_2 = 0.13911$<br>$\omega_0 = 0.04347; \omega_1 = 0.04347; \omega_2 = 0.94823$  | M0         | -705.87    | $\omega = 0.13502$                                                          | 30.58      | <b>3.73E-06</b> | none                                            |                           |
|         | M2        | -690.60                       | $p_0 = 0.86290; p_1 = 0.07947; p_2 = 0.05763$<br>$\omega_0 = 0.04402; \omega_1 = 1.00000; \omega_2 = 1.00000$  | M1         | -690.60    | $p_0 = 0.86290; p_1 = 0.13710$<br>$\omega_0 = 0.04402; \omega_1 = 1.00000$  | 0          | 1               | N.A                                             |                           |
|         | M8        | -692.53                       | $p_0 = 0.99999; p = 0.20658; q = 0.99525$<br>$(p1 = 0.00001) \omega = 2.02409$                                 | M7         | -692.53    | $p = 0.20659; q = 0.99525$                                                  | 0          | 1               | N.A                                             |                           |
| H1.2    | M3        | -1100.10                      | $p_0 = 0.27878; p_1 = 0.42483; p_2 = 0.29639$<br>$\omega_0 = 0.00000; \omega_1 = 0.00000; \omega_2 = 0.02825$  | M0         | -1100.76   | $\omega = 0.00776$                                                          | 1.32       | 0.857602        | none                                            |                           |
|         | M2        | -1100.76                      | $p_0 = 1.00000; p_1 = 0.00000; p_2 = 0.00000$<br>$\omega_0 = 0.00776; \omega_1 = 1.00000; \omega_2 = 1.00000$  | M1         | -1100.76   | $p_0 = 0.99999; p_1 = 0.00001$<br>$\omega_0 = 0.00776; \omega_1 = 1.00000$  | 0          | 0.999261        | N.A                                             |                           |
|         | M8        | -1100.13                      | $p_0 = 0.99999; p = 0.25028; q = 26.50296$<br>$(p1 = 0.00001) \omega = 10.87047$                               | M7         | -1100.12   | $p = 0.25030; q = 26.51017$                                                 | 0          | 1               | N.A                                             |                           |
| CTD     | M3        | -2131.31                      | $p_0 = 0.37216; p_1 = 0.32322; p_2 = 0.30432$<br>$\omega_0 = 0.10713; \omega_1 = 0.53443; \omega_2 = 0.53443$  | M0         | -2135.56   | $\omega = 0.34494$                                                          | 8.51       | 0.074665        | none                                            |                           |
|         | M2        | -2133.10                      | $p_0 = 0.85212; p_1 = 0.12322; p_2 = 0.02467$<br>$\omega_0 = 0.27389; \omega_1 = 1.00000; \omega_2 = 1.00000$  | M1         | -2133.10   | $p_0 = 0.85212; p_1 = 0.14788$<br>$\omega_0 = 0.27389; \omega_1 = 1.00000$  | 0          | 1               | N.A                                             |                           |
|         | M8        | -2131.65                      | $p_0 = 0.98571; p = 1.54259; q = 2.69390$<br>$(p1 = 0.01420) \omega = 1.45608$                                 | M7         | -2131.68   | $p = 1.39825; q = 2.30813$                                                  | 0.06       | 0.96985         | N.A                                             |                           |
| NTD     | M3        | -886.48                       | $p_0 = 0.54586; p_1 = 0.37982; p_2 = 0.07431$<br>$\omega_0 = 0.02494; \omega_1 = 0.39819; \omega_2 = 1.63394$  | M0         | -913.51    | $\omega = 0.24263$                                                          | 54.06      | <b>5.11E-11</b> | 28*, 31**                                       |                           |
|         | M2        | -889.39                       | $p_0 = 0.73581; p_1 = 0.18393; p_2 = 0.08027$<br>$\omega_0 = 0.06756; \omega_1 = 1.00000; \omega_2 = 1.00000$  | M1         | -889.39    | $p_0 = 0.73581; p_1 = 0.26419$<br>$\omega_0 = 0.06756; \omega_1 = 1.00000$  | 0          | 1               | N.A                                             |                           |
|         | M8        | -886.48                       | $p_0 = 0.93254; p = 0.36880; q = 1.53450$<br>$(p1 = 0.06746) \omega = 1.64522$                                 | M7         | -887.70    | $p = 0.25146; q = 0.68312$                                                  | 2.44       | 0.294741        | N.A                                             |                           |
| H1.3    | M3        | -1146.03                      | $p_0 = 0.43225; p_1 = 0.25374; p_2 = 0.31400$<br>$\omega_0 = 0.00000; \omega_1 = 0.02952; \omega_2 = 0.02953$  | M0         | -1146.62   | $\omega = 0.01620$                                                          | 1.18       | 0.880967        | N.A                                             |                           |
|         | M2        | -1146.62                      | $p_0 = 1.00000; p_1 = 0.00000; p_2 = 0.00000$<br>$\omega_0 = 0.01620; \omega_1 = 1.00000; \omega_2 = 1.00000$  | M1         | -1146.62   | $p_0 = 0.99999; p_1 = 0.00001$<br>$\omega_0 = 0.01620; \omega_1 = 1.00000$  | 0          | 1               | N.A                                             |                           |
|         | M8        | -1146.13                      | $p_0 = 0.99999; p = 0.91004; q = 51.47618$<br>$(p1 = 0.00001) \omega = 1.00000$                                | M7         | -1146.13   | $p = 0.91001; q = 51.47487$                                                 | 0          | 1               | N.A                                             |                           |
| CTD     | M3        | -2781.38                      | $p_0 = 0.16502; p_1 = 0.75793; p_2 = 0.07705$<br>$\omega_0 = 0.04829; \omega_1 = 0.64271; \omega_2 = 1.72365$  | M0         | -2794.91   | $\omega = 0.53524$                                                          | 27.06      | <b>1.93E-05</b> | 151, 157, 214                                   |                           |
|         | M2        | -2783.99                      | $p_0 = 0.35527; p_1 = 0.52774; p_2 = 0.11699$<br>$\omega_0 = 0.15442; \omega_1 = 1.00000; \omega_2 = 1.00000$  | M1         | -2783.99   | $p_0 = 0.35527; p_1 = 0.64473$<br>$\omega_0 = 0.15442; \omega_1 = 1.00000$  | 0          | 1               | N.A                                             |                           |
|         | M8        | -2782.27                      | $p_0 = 0.97807; p = 0.76895; q = 0.50007$<br>$(p1 = 0.02193) \omega = 1.87312$                                 | M7         | -2782.34   | $p = 0.71873; q = 0.43073$                                                  | 0          | 0.936483        | N.A                                             |                           |
| NTD     | M3        | -575.51                       | $p_0 = 0.31303; p_1 = 0.34054; p_2 = 0.34643$<br>$\omega_0 = 0.00122; \omega_1 = 0.00122; \omega_2 = 0.17872$  | M0         | -578.03    | $\omega = 0.05146$                                                          | 5.03       | 0.284109        | N.A                                             |                           |
|         | M2        | -578.03                       | $p_0 = 1.00000; p_1 = 0.00000; p_2 = 0.00000$<br>$\omega_0 = 0.05146; \omega_1 = 1.00000; \omega_2 = 1.00000$  | M1         | -578.03    | $p_0 = 0.99999; p_1 = 0.00001$<br>$\omega_0 = 0.05146; \omega_1 = 1.00000$  | 0          | 0.999894        | N.A                                             |                           |
|         | M8        | -575.69                       | $p_0 = 0.99999; p = 0.27252; q = 3.97468$<br>$(p1 = 0.00001) \omega = 2.56483$                                 | M7         | -575.69    | $p = 0.27253; q = 3.97487$                                                  | 0          | 1               | N.A                                             |                           |
| H1.4    | M3        | -978.19                       | $p_0 = 0.32324; p_1 = 0.31938; p_2 = 0.35737$<br>$\omega_0 = 0.00520; \omega_1 = 0.00520; \omega_2 = 0.00520$  | M0         | -978.19    | $\omega = 0.00520$                                                          | 0          | 1               | none                                            |                           |
|         | M2        | -978.19                       | $p_0 = 1.00000; p_1 = 0.00000; p_2 = 0.00000$<br>$\omega_0 = 0.00520; \omega_1 = 1.00000; \omega_2 = 41.27124$ | M1         | -978.19    | $p_0 = 0.96144; p_1 = 0.03856$<br>$\omega_0 = 0.00520; \omega_1 = 1.00000$  | 0          | 0.999258        | N.A                                             |                           |
|         | M8        | -978.27                       | $p_0 = 0.99999; p = 0.57187; q = 99.00000$<br>$(p1 = 0.00001) \omega = 1.00000$                                | M7         | -978.27    | $p = 0.57187; q = 99.00000$                                                 | 0          | 1               | N.A                                             |                           |
| CTD     | M3        | -1849.41                      | $p_0 = 0.48578; p_1 = 0.33273; p_2 = 0.18149$<br>$\omega_0 = 0.10554; \omega_1 = 0.96916; \omega_2 = 0.96917$  | M0         | -1855.69   | $\omega = 0.48708$                                                          | 12.55      | <b>0.013679</b> | 157, 191                                        |                           |
|         | M2        | -1849.42                      | $p_0 = 0.49888; p_1 = 0.39243; p_2 = 0.10869$<br>$\omega_0 = 0.11025; \omega_1 = 1.00000; \omega_2 = 1.24082$  | M1         | -1849.42   | $p_0 = 0.49888; p_1 = 0.50112$<br>$\omega_0 = 0.11025; \omega_1 = 1.00000$  | 0          | 1               | N.A                                             |                           |
|         | M8        | -1850.16                      | $p_0 = 0.98154; p = 0.41906; q = 0.40335$<br>$(p1 = 0.01846) \omega = 2.37149$                                 | M7         | -1850.21   | $p = 0.36980; q = 0.32600$                                                  | 0.09       | 0.954987        | N.A                                             |                           |
| NTD     | M3        | -782.62                       | $p_0 = 0.33843; p_1 = 0.39289; p_2 = 0.26868$<br>$\omega_0 = 0.01508; \omega_1 = 0.01508; \omega_2 = 0.30089$  | M0         | -791.21    | $\omega = 0.07664$                                                          | 17.18      | <b>0.001784</b> | none                                            |                           |
|         | M2        | -788.34                       | $p_0 = 0.87538; p_1 = 0.10081; p_2 = 0.02381$<br>$\omega_0 = 0.03947; \omega_1 = 1.00000; \omega_2 = 1.00000$  | M1         | -788.34    | $p_0 = 0.87538; p_1 = 0.124623$<br>$\omega_0 = 0.03947; \omega_1 = 1.00000$ | 0          | 1               | N.A                                             |                           |
|         | M8        | -783.05                       | $p_0 = 0.99999; p = 0.27828; q = 2.70330$<br>$(p1 = 0.00001) \omega = 1.00000$                                 | M7         | -783.05    | $p = 0.27828; q = 2.70325$                                                  | 0          | 1               | N.A                                             |                           |
| H1.5    | M3        | -1259.24                      | $p_0 = 0.05766; p_1 = 0.84022; p_2 = 0.10213$<br>$\omega_0 = 0.00494; \omega_1 = 0.00495; \omega_2 = 0.18456$  | M0         | -1270.96   | $\omega = 0.02055$                                                          | 23.44      | <b>0.000103</b> | none                                            |                           |
|         | M2        | -1268.87                      | $p_0 = 0.98207; p_1 = 0.00079; p_2 = 0.01714$<br>$\omega_0 = 0.01564; \omega_1 = 1.00000; \omega_2 = 1.00000$  | M1         | -1268.87   | $p_0 = 0.98207; p_1 = 0.01793$<br>$\omega_0 = 0.01564; \omega_1 = 1.00000$  | 0          | 1               | N.A                                             |                           |
|         | M8        | -1259.46                      | $p_0 = 0.99999; p = 0.10058; q = 3.45503$<br>$(p1 = 0.00001) \omega = 1.00000$                                 | M7         | -1259.46   | $p = 0.10058; q = 3.45504$                                                  | 0          | 1               | N.A                                             |                           |
| CTD     | M3        | -2641.96                      | $p_0 = 0.47929; p_1 = 0.44192; p_2 = 0.07879$<br>$\omega_0 = 0.08707; \omega_1 = 0.36677; \omega_2 = 1.45759$  | M0         | -2654.30   | $\omega = 0.26325$                                                          | 24.68      | <b>5.84E-05</b> | 140, 149*, 185, 187*, 214, 218                  |                           |
|         | M2        | -2643.12                      | $p_0 = 0.82648; p_1 = 0.10794; p_2 = 0.06558$<br>$\omega_0 = 0.16216; \omega_1 = 1.00000; \omega_2 = 1.00000$  | M1         | -2643.12   | $p_0 = 0.82648; p_1 = 0.17352$<br>$\omega_0 = 0.16216; \omega_1 = 1.00000$  | 0          | 1               | N.A                                             |                           |
|         | M8        | -2642.31                      | $p_0 = 0.91210; p = 1.77210; q = 6.46942$<br>$(p1 = 0.08790) \omega = 1.39165$                                 | M7         | -2643.79   | $p = 0.73402; q = 1.69066$                                                  | 2.96       | 0.227754        | N.A                                             |                           |

The sequences were partitioned by structural domains before running Codeml and a maximum likelihood phylogenetic tree was reconstructed for each partition with PhyML, using the best fitted nucleotide substitution model (Table S2). The model pairs compared in each partition were M0-M3; M1-M2 and M7-M8. InL, log likelihood; LRT, likelihood ratio test. In bold, p-values > 0.05, that allowed to accept the model with positive selection. Sites with posterior probability >0.5 are listed; \*, posterior probability > 0.9; \*\*, posterior probability > 0.95. The positions of the positively selected sites are referred to the sequence alignment in Figure 1. N.A, not allowed, as the null model was accepted.

**Table S9. Positive selection analysis of H1.1 partition 3 with REL and ADAPTSITE**

| REL      |              |                       |           | ADAPTSITE |         |           |
|----------|--------------|-----------------------|-----------|-----------|---------|-----------|
| Position | Bayes factor | Posterior probability | Selection | Position  | p-value | Selection |
| 116      | 228.54       | 0.999672              | N         | 116       | 0.007   | N         |
| 117      | 2927.73      | 0.999974              | N         | 117       | 0.001   | N         |
| 123      | 378.95       | 0.999802              | N         | 123       | 0.03    | N         |
| 124      | 87.96        | 0.868544              | P         | 125       | 0.037   | P         |
| 125      | 70.76        | 0.842647              | P         | 130       | 0.034   | N         |
| 129      | 517.10       | 1                     | N         | 135       | 0.02    | N         |
| 133      | 104.91       | 0.999285              | N         | 140       | 0       | N         |
| 143      | 778.73       | 0.999904              | N         | 143       | 0.001   | N         |
| 147      | 295.29       | 0.999746              | N         | 144       | 0.004   | N         |
| 155      | 328.33       | 0.999771              | N         | 145       | 0.039   | N         |
| 156      | 1172.55      | 0.999936              | N         | 146       | 0.016   | N         |
| 158      | 1.47E+15     | 1                     | N         | 149       | 0.002   | N         |
| 160      | 225.47       | 0.999667              | N         | 151       | 0.003   | N         |
| 167      | 283.51       | 0.999735              | N         | 155       | 0       | N         |
| 169      | 111.81       | 0.999329              | N         | 156       | 0       | N         |
| 179      | 822.44       | 0.999909              | N         | 157       | 0.008   | N         |
| 180      | 300.77       | 0.99975               | N         | 160       | 0.002   | N         |
| 181      | 38860.9      | 0.999998              | N         | 166       | 0.024   | N         |
| 183      | 668.03       | 0.998877              | N         | 168       | 0.014   | N         |
| 184      | 305.14       | 0.999754              | N         | 169       | 0.002   | N         |
| 188      | 4.29E+12     | 1                     | N         | 181       | 0.009   | N         |
| 190      | 3.16E+05     | 0.999762              | N         | 182       | 0.006   | N         |
| 192      | 339.64       | 0.999779              | N         | 183       | 0.005   | N         |
| 193      | 183.45       | 0.999591              | N         | 184       | 0.031   | N         |
| 196      | 292.08       | 0.999743              | N         | 185       | 0.048   | N         |
| 197      | 128.19       | 0.999999              | N         | 186       | 0.006   | N         |
| 198      | 128.95       | 0.999418              | N         | 190       | 0.032   | N         |
| 199      | 203.89       | 0.999632              | N         | 192       | 0.031   | N         |
| 202      | 292.33       | 0.999743              | N         | 193       | 0.002   | N         |
| 203      | 206.05       | 0.999636              | N         | 196       | 0.007   | N         |
| 204      | 1.12E+14     | 1                     | N         | 198       | 0       | N         |
| 205      | 2.77E+05     | 0.999729              | N         | 203       | 0.001   | N         |
| 206      | 150.90       | 0.999503              | N         | 205       | 0.001   | N         |
| 207      | 184.38       | 0.999593              | N         | 206       | 0.01    | N         |
| 210      | 342.59       | 0.999781              | N         | 207       | 0.002   | N         |
| 211      | 794.09       | 0.999055              | N         | 210       | 0.031   | N         |
| 213      | 3.59E+12     | 1                     | N         | 211       | 0.005   | N         |
| 214      | 1.61E+05     | 0.999534              | N         | 214       | 0.01    | N         |
| 215      | 283.51       | 0.999735              | N         | 216       | 0       | N         |
| 216      | 1504.86      | 0.99995               | N         | 217       | 0.031   | N         |
| 217      | 358.42       | 0.999791              | N         | 218       | 0.001   | N         |
| 221      | 301.71       | 0.999751              | N         | 221       | 0.001   | N         |
| 222      | 130594.00    | 0.999425              | N         | 222       | 0.034   | N         |
| 228      | 303.91       | 0.999753              | N         | 229       | 0.031   | N         |
| 229      | 318869.00    | 0.999765              | N         | 230       | 0.006   | N         |
| 230      | 299.93       | 0.99975               | N         | 231       | 0.018   | N         |
| 234      | 283.51       | 0.999735              | N         | 234       | 0       | N         |

The positions are referred to the multiple sequence alignment in Figure 1. In red, basic residues. P, positive selection; N, negative selection.

**Table S10. Percentages of the different amino acid types in H1.1**

| <b>Species</b>         | <b>Basic</b> | <b>Acid</b> | <b>Polar</b> | <b>Hydrophobic</b> | <b>Aromatic</b> |
|------------------------|--------------|-------------|--------------|--------------------|-----------------|
| <i>H. sapiens</i>      | 38.8         | 1.0         | 19.4         | 40.8               | 0.0             |
| <i>M. mulata</i>       | 37.9         | 1.0         | 20.4         | 40.8               | 0.0             |
| <i>P. troglodytes</i>  | 38.8         | 1.0         | 18.4         | 41.7               | 0.0             |
| <i>T. syrichta</i>     | 35.2         | 0.9         | 18.5         | 45.4               | 0.0             |
| <i>O. garnettii</i>    | 37.0         | 1.0         | 15.0         | 45.0               | 0.0             |
| <i>P. anubis</i>       | 37.9         | 1.0         | 20.4         | 40.8               | 0.0             |
| <i>C. sabaeus</i>      | 37.9         | 1.0         | 19.4         | 41.7               | 0.0             |
| <i>C. atys</i>         | 38.2         | 1.0         | 21.6         | 39.2               | 0.0             |
| <i>M. musculus</i>     | 39.2         | 1.0         | 15.7         | 44.1               | 0.0             |
| <i>R. norvegicus</i>   | 38.8         | 1.0         | 16.5         | 43.7               | 0.0             |
| <i>M. auratus</i>      | 39.2         | 1.0         | 15.7         | 44.1               | 0.0             |
| <i>P. maniculatus</i>  | 39.2         | 1.0         | 13.7         | 46.1               | 0.0             |
| <i>M. ochrogaster</i>  | 39.2         | 1.0         | 16.7         | 43.1               | 0.0             |
| <i>N. galli</i>        | 39.2         | 1.0         | 13.7         | 46.1               | 0.0             |
| <i>J. jaculus</i>      | 37.5         | 1.0         | 7.7          | 53.8               | 0.0             |
| <i>B. taurus</i>       | 37.7         | 0.9         | 17.9         | 43.4               | 0.0             |
| <i>C. ferus</i>        | 37.7         | 0.9         | 13.2         | 48.1               | 0.0             |
| <i>B. bison</i>        | 37.7         | 0.9         | 17.9         | 43.4               | 0.0             |
| <i>C. familiaris</i>   | 38.8         | 1.0         | 9.7          | 49.5               | 0.0             |
| <i>F. catus</i>        | 38.8         | 1.0         | 12.6         | 47.6               | 0.0             |
| <i>O. orca</i>         | 37.7         | 0.9         | 17.0         | 44.3               | 0.0             |
| <i>L. vexillifer</i>   | 38.1         | 1.0         | 16.2         | 44.8               | 0.0             |
| <i>E. caballus</i>     | 42.1         | 1.1         | 15.8         | 41.1               | 0.0             |
| <i>C. cristata</i>     | 38.1         | 0.0         | 13.3         | 48.6               | 0.0             |
| <i>P. alecto</i>       | 37.7         | 0.9         | 9.4          | 50.9               | 0.9             |
| <i>G. variegatus</i>   | 38.5         | 1.0         | 13.5         | 46.2               | 1.0             |
| <i>D. novemcinctus</i> | 38.5         | 1.0         | 8.7          | 51.9               | 0.0             |

Amino acid composition for each sequence was obtained with ProtParam (Expasy) and averaged by amino acid type. Basic, K and R; Acid, D and E; Polar, S, T and N; Hydrophobic, A, G, I, L, M, P, V; Aromatic, F
